# Supplementary material for: Socioeconomic inequalities in COVID-19 infection and vaccine uptake among children and adolescents in Catalonia, Spain: a population-based cohort study
Source: Frontiers journal article supplement (doi:10.3389/fped.2024.1466884), 2024-11-19
Supplement: Data_Sheet_1.pdf [file Data_Sheet_1.pdf]

## Supplementary Material

### 1 Supplementary Tables

**Table S1. Baseline characteristics of study participants with and without missing data on Socioeconomic Deprivation Index**

|                               | Pre-Vaccination Period,<br>Children |                                     |       | Pre-Vaccination Period,<br>Adolescents |                                     |        | Vaccination Period,<br>Children  |                                     |       | Vaccination Period,<br>Adolescents |                                     |       |
|-------------------------------|-------------------------------------|-------------------------------------|-------|----------------------------------------|-------------------------------------|--------|----------------------------------|-------------------------------------|-------|------------------------------------|-------------------------------------|-------|
|                               | <u>With<br/>missing<br/>data</u>    | <u>Without<br/>missing<br/>data</u> |       | <u>With<br/>missing<br/>data</u>       | <u>Without<br/>missing<br/>data</u> |        | <u>With<br/>missing<br/>data</u> | <u>Without<br/>missing<br/>data</u> |       | <u>With<br/>missing<br/>data</u>   | <u>Without<br/>missing<br/>data</u> |       |
| Characteristic                | (column<br>)                        | (column<br>)                        | SMD   | (column<br>)                           | (column<br>)                        | SMD    | (column<br>)                     | (column<br>)                        | SMD   | (column<br>)                       | (column<br>)                        | SMD   |
| <b>N</b>                      | 53,902                              | 293,077                             |       | 28,527                                 | 181,306                             |        | 55,950                           | 285,733                             |       | 28,231                             | 183,606                             |       |
| <b>Age (median<br/>[IQR])</b> | 8.0 [6.0,<br>10.0]                  | 8.0 [6.0,<br>10.0]                  | 0.116 | 13.0<br>[12.0,<br>14.0]                | 13.0<br>[12.0,<br>14.0]             | <0.001 | 8.0 [6.0,<br>10.0]               | 8.0 [6.0,<br>10.0]                  | 0.156 | 13.0<br>[12.0,<br>14.0]            | 13.0<br>[12.0,<br>14.0]             | 0.012 |
| <b>Sex, male</b>              | 27,966<br>(51.9)                    | 150,843<br>(51.5)                   | 0.008 | 14,653<br>(51.4)                       | 93,279<br>(51.4)                    | 0.002  | 28,929<br>(51.7)                 | 146,886<br>(51.4)                   | 0.006 | 14,568<br>(51.6)                   | 94,590<br>(51.5)                    | 0.002 |
| <b>Nationality</b>            |                                     |                                     | 0.155 |                                        |                                     | 0.131  |                                  |                                     | 0.177 |                                    |                                     | 0.129 |
|                               | 47,809<br>(88.7)                    | 252,695<br>(86.2)                   |       | 25,306<br>(88.7)                       | 161,214<br>(88.9)                   |        | 49,459<br>(88.4)                 | 242,339<br>(84.8)                   |       | 24,917<br>(88.3)                   | 161,607<br>(88.0)                   |       |
|                               | 1,742<br>(3.2)                      | 13,052<br>(4.5)                     |       | 733<br>(2.6)                           | 5,316<br>(2.9)                      |        | 1,962<br>(3.5)                   | 14,055<br>(4.9)                     |       | 789<br>(2.8)                       | 5,797<br>(3.2)                      |       |

|  |                |                |  |              |                |  |                |                 |  |              |                |  |
|--|----------------|----------------|--|--------------|----------------|--|----------------|-----------------|--|--------------|----------------|--|
|  | 1,141<br>(2.1) | 8,945<br>(3.1) |  | 728<br>(2.6) | 5,007<br>(2.8) |  | 1,343<br>(2.4) | 10,788<br>(3.8) |  | 775<br>(2.7) | 5,757<br>(3.1) |  |
|  | 876<br>(1.6)   | 9,563<br>(3.3) |  | 474<br>(1.7) | 5,101<br>(2.8) |  | 806<br>(1.4)   | 9,589<br>(3.4)  |  | 485<br>(1.7) | 5,473<br>(3.0) |  |
|  | 1,422<br>(2.6) | 5,522<br>(1.9) |  | 819<br>(2.9) | 3,051<br>(1.7) |  | 1,369<br>(2.4) | 5,392<br>(1.9)  |  | 788<br>(2.8) | 3,250<br>(1.8) |  |
|  | 912<br>(1.7)   | 3,300<br>(1.1) |  | 467<br>(1.6) | 1,617<br>(0.9) |  | 1,011<br>(1.8) | 3,570<br>(1.2)  |  | 477<br>(1.7) | 1,722<br>(0.9) |  |

IQR, interquartil range; SMD, standardized mean difference

**Table S2.** Cumulative incidence of COVID-19 infection and vaccine coverage by cohort, overall and by sex and Socioeconomic Deprivation Index quintile\*

|                                             | Overall        | Q1            | Q2            | Q3            | Q4            | Q5            |
|---------------------------------------------|----------------|---------------|---------------|---------------|---------------|---------------|
| <b>Pre-vaccination rollout, Children</b>    |                |               |               |               |               |               |
| <u>Infection</u>                            |                |               |               |               |               |               |
| Overall                                     | 167,73 (5.8)   | 2,441 (4.6)   | 2,862 (5.1)   | 3,058 (5.4)   | 3,867 (6.4)   | 4,545 (7.0)   |
| Female                                      | 8,122 (5.8)    | 1,174 (4.6)   | 1,366 (5.1)   | 1,488 (5.4)   | 1,912 (6.6)   | 2,182 (6.9)   |
| Male                                        | 8,651 (5.8)    | 1,267 (4.6)   | 1,496 (5.2)   | 1,570 (5.4)   | 1,955 (6.3)   | 2,363 (7.1)   |
| <b>Pre-vaccination rollout, Adolescents</b> |                |               |               |               |               |               |
| <u>Infection</u>                            |                |               |               |               |               |               |
| Overall                                     | 15,430 (8.6)   | 2,597 (7.5)   | 2,908 (8.2)   | 3,039 (8.5)   | 3,078 (8.6)   | 3,808 (10.1)  |
| Female                                      | 7,542 (8.6)    | 1,261 (7.5)   | 1,406 (8.1)   | 1,464 (8.4)   | 1,529 (8.8)   | 1,882 (10.3)  |
| Male                                        | 7,888 (8.5)    | 1,336 (7.6)   | 1,502 (8.2)   | 1,575 (8.6)   | 1,549 (8.4)   | 1,926 (9.8)   |
| <b>Vaccination rollout, Children</b>        |                |               |               |               |               |               |
| <u>Infection</u>                            |                |               |               |               |               |               |
| Overall                                     | 92,958 (33.6)  | 19,729 (39.3) | 19,501 (37.3) | 18,656 (34.7) | 18,334 (31.9) | 16,738 (26.5) |
| Female                                      | 44,677 (33.2)  | 94,36 (38.7)  | 9,414 (37.2)  | 9,079 (34.7)  | 8,697 (31.2)  | 8,051 (26.1)  |
| Male                                        | 48,281 (33.9)  | 10,293 (39.9) | 10,087 (37.3) | 9,577 (34.8)  | 9,637 (32.6)  | 8,687 (26.9)  |
| <u>Vaccination</u>                          |                |               |               |               |               |               |
| Overall                                     | 12,3018 (44.8) | 24,970 (50.2) | 25,117 (48.5) | 24,743 (46.5) | 25,465 (44.7) | 22,723 (36.2) |
| Female                                      | 59,975 (44.9)  | 12,141 (50.2) | 12,173 (48.6) | 11,998 (46.2) | 12,484 (45.1) | 11,179 (36.5) |
| Male                                        | 63,043 (44.7)  | 12,829 (50.2) | 12,944 (48.4) | 12,745 (46.7) | 12,981 (44.3) | 11,544 (35.9) |
| <b>Vaccination rollout, Adolescents</b>     |                |               |               |               |               |               |
| <u>Infection</u>                            |                |               |               |               |               |               |

|                    |                |               |               |               |               |               |
|--------------------|----------------|---------------|---------------|---------------|---------------|---------------|
| Overall            | 2,815 (1.6)    | 408 (1.3)     | 502 (1.5)     | 527 (1.5)     | 598 (1.7)     | 780 (2.1)     |
| Female             | 1,466 (1.7)    | 208 (1.3)     | 266 (1.6)     | 284 (1.7)     | 293 (1.7)     | 415 (2.3)     |
| Male               | 1,349 (1.5)    | 200 (1.2)     | 236 (1.3)     | 243 (1.4)     | 305 (1.7)     | 365 (1.9)     |
| <u>Vaccination</u> |                |               |               |               |               |               |
| Overall            | 126,995 (72.6) | 24,216 (74.6) | 25,853 (75.2) | 25,716 (74.1) | 25,924 (73.0) | 25,286 (66.9) |
| Female             | 61,712 (73.0)  | 11,662 (74.3) | 12,540 (75.5) | 12,533 (74.2) | 12,724 (74.1) | 12,253 (67.5) |
| Male               | 65,283 (72.3)  | 12,554 (75.0) | 13,313 (74.9) | 13,183 (74.0) | 13,200 (72.0) | 13,033 (66.4) |

\*Values are no. (%) except as indicated. Pre-vaccination period (Sep 26 - Dec 26 2020), Vaccination period, adolescents (Aug 1 - Oct 1 2021), Vaccination period, children (15 Dec 2021 - 15 Mar 2022). Quintiles listed from least deprived (Q1) to most deprived (Q5). IQR, interquartile range; SDI, Socioeconomic Deprivation Index.

**Table S3.** Crude Hazard Ratios of COVID-19 infection and vaccination 3 months before and after vaccination rollout by Socioeconomic Deprivation Index quintile by SDI quintile relative to Q1, stratified by sex and previous COVID-19 infection.

|                                                       | HR (95% CI)        | HR Female (95% CI) | HR Male (95% CI)   | HR Without Previous COVID-19 (95% CI) |
|-------------------------------------------------------|--------------------|--------------------|--------------------|---------------------------------------|
| <b>Infection, Pre-vaccination period, Children</b>    |                    |                    |                    |                                       |
| Q1 (ref.)                                             | 1 [Reference]      | 1 [Reference]      | 1 [Reference]      | 1 [Reference]                         |
| Q2                                                    | 1.12 (1.06 - 1.18) | 1.12 (1.04 - 1.21) | 1.12 (1.04 - 1.21) | 1.12 (1.06 - 1.18)                    |
| Q3                                                    | 1.18 (1.12 - 1.24) | 1.18 (1.10 - 1.28) | 1.17 (1.09 - 1.26) | 1.17 (1.11 - 1.24)                    |
| Q4                                                    | 1.42 (1.35 - 1.49) | 1.46 (1.35 - 1.57) | 1.38 (1.28 - 1.48) | 1.41 (1.34 - 1.49)                    |
| Q5                                                    | 1.55 (1.47 - 1.63) | 1.54 (1.43 - 1.65) | 1.56 (1.46 - 1.67) | 1.55 (1.47 - 1.63)                    |
| <b>Infection, Pre-vaccination period, Adolescents</b> |                    |                    |                    |                                       |
| Q1 (ref.)                                             | 1 [Reference]      | 1 [Reference]      | 1 [Reference]      | 1 [Reference]                         |
| Q2                                                    | 1.09 (1.03 - 1.15) | 1.08 (1.01 - 1.17) | 1.09 (1.01 - 1.17) | 1.09 (1.03 - 1.15)                    |
| Q3                                                    | 1.14 (1.08 - 1.20) | 1.13 (1.05 - 1.22) | 1.15 (1.07 - 1.23) | 1.13 (1.08 - 1.20)                    |
| Q4                                                    | 1.14 (1.08 - 1.20) | 1.18 (1.09 - 1.27) | 1.11 (1.03 - 1.20) | 1.14 (1.08 - 1.20)                    |
| Q5                                                    | 1.36 (1.29 - 1.43) | 1.40 (1.31 - 1.51) | 1.32 (1.23 - 1.41) | 1.36 (1.29 - 1.43)                    |
| <b>Infection, Vaccination period, Children</b>        |                    |                    |                    |                                       |
| Q1 (ref.)                                             | 1 [Reference]      | 1 [Reference]      | 1 [Reference]      | 1 [Reference]                         |
| Q2                                                    | 0.94 (0.92 - 0.95) | 0.96 (0.93 - 0.98) | 0.92 (0.89 - 0.94) | 0.94 (0.92 - 0.96)                    |
| Q3                                                    | 0.86 (0.84 - 0.88) | 0.88 (0.85 - 0.90) | 0.84 (0.82 - 0.87) | 0.86 (0.84 - 0.87)                    |
| Q4                                                    | 0.78 (0.76 - 0.79) | 0.77 (0.75 - 0.79) | 0.78 (0.76 - 0.80) | 0.78 (0.76 - 0.79)                    |
| Q5                                                    | 0.62 (0.61 - 0.64) | 0.63 (0.61 - 0.65) | 0.62 (0.60 - 0.64) | 0.62 (0.61 - 0.64)                    |
| <b>Infection, Vaccination period, Adolescents</b>     |                    |                    |                    |                                       |
| Q1 (ref.)                                             | 1 [Reference]      | 1 [Reference]      | 1 [Reference]      | 1 [Reference]                         |
| Q2                                                    | 1.16 (1.02 - 1.32) | 1.21 (1.01 - 1.45) | 1.11 (0.92 - 1.34) | 1.13 (0.98 - 1.30)                    |
| Q3                                                    | 1.21 (1.06 - 1.38) | 1.27 (1.06 - 1.52) | 1.14 (0.95 - 1.38) | 1.19 (1.03 - 1.36)                    |
| Q4                                                    | 1.34 (1.18 - 1.52) | 1.29 (1.08 - 1.54) | 1.40 (1.17 - 1.67) | 1.35 (1.18 - 1.55)                    |
| Q5                                                    | 1.65 (1.46 - 1.86) | 1.73 (1.47 - 2.05) | 1.56 (1.31 - 1.86) | 1.60 (1.41 - 1.82)                    |
| <b>Vaccination, Vaccination period, Children</b>      |                    |                    |                    |                                       |
| Q1 (ref.)                                             | 1 [Reference]      | 1 [Reference]      | 1 [Reference]      | 1 [Reference]                         |
| Q2                                                    | 0.92 (0.91 - 0.94) | 0.93 (0.90 - 0.95) | 0.92 (0.90 - 0.94) | 0.92 (0.91 - 0.94)                    |

|                                                     |                    |                    |                    |                    |
|-----------------------------------------------------|--------------------|--------------------|--------------------|--------------------|
| Q3                                                  | 0.85 (0.84 - 0.87) | 0.85 (0.83 - 0.87) | 0.86 (0.83 - 0.88) | 0.85 (0.84 - 0.87) |
| Q4                                                  | 0.79 (0.78-0.81)   | 0.80 (0.78 - 0.82) | 0.78 (0.76 - 0.80) | 0.79 (0.78-0.81)   |
| Q5                                                  | 0.58 (0.57 - 0.59) | 0.59 (0.57 - 0.60) | 0.58 (0.56 - 0.59) | 0.57 (0.56 - 0.58) |
| <b>Vaccination, Vaccination period, Adolescents</b> |                    |                    |                    |                    |
| Q1 (ref.)                                           | 1 [Reference]      | 1 [Reference]      | 1 [Reference]      | 1 [Reference]      |
| Q2                                                  | 1.02 (1.00 - 1.04) | 1.03 (1.01 - 1.06) | 1.01 (0.99 - 1.03) | 1.02 (1.00 - 1.04) |
| Q3                                                  | 0.98 (0.97 - 1.00) | 0.99 (0.97 - 1.02) | 0.98 (0.95 - 1.00) | 0.98 (0.96 - 1.00) |
| Q4                                                  | 0.94 (0.93 - 0.96) | 0.98 (0.95 - 1.00) | 0.91 (0.89 - 0.94) | 0.94 (0.92 - 0.96) |
| Q5                                                  | 0.79 (0.77 - 0.80) | 0.81 (0.79 - 0.83) | 0.77 (0.75 - 0.79) | 0.77 (0.76 - 0.79) |

Quintiles listed from least deprived (Q1) to most deprived (Q5). SDI, Socioeconomic Deprivation Index; COVID-19; Coronavirus Disease 2019. Pre-vaccination period (Sep 26 - Dec 26 2020), Vaccination period, adolescents (Aug 1 - Oct 1 2021), Vaccination period, children (15 Dec 2021 - 15 Mar 2022).

## 2 Supplementary Figures

**Figure S1.** Log-log survival curves to COVID-19 infection or vaccination by Socioeconomic Deprivation Index quintile, for each study period.

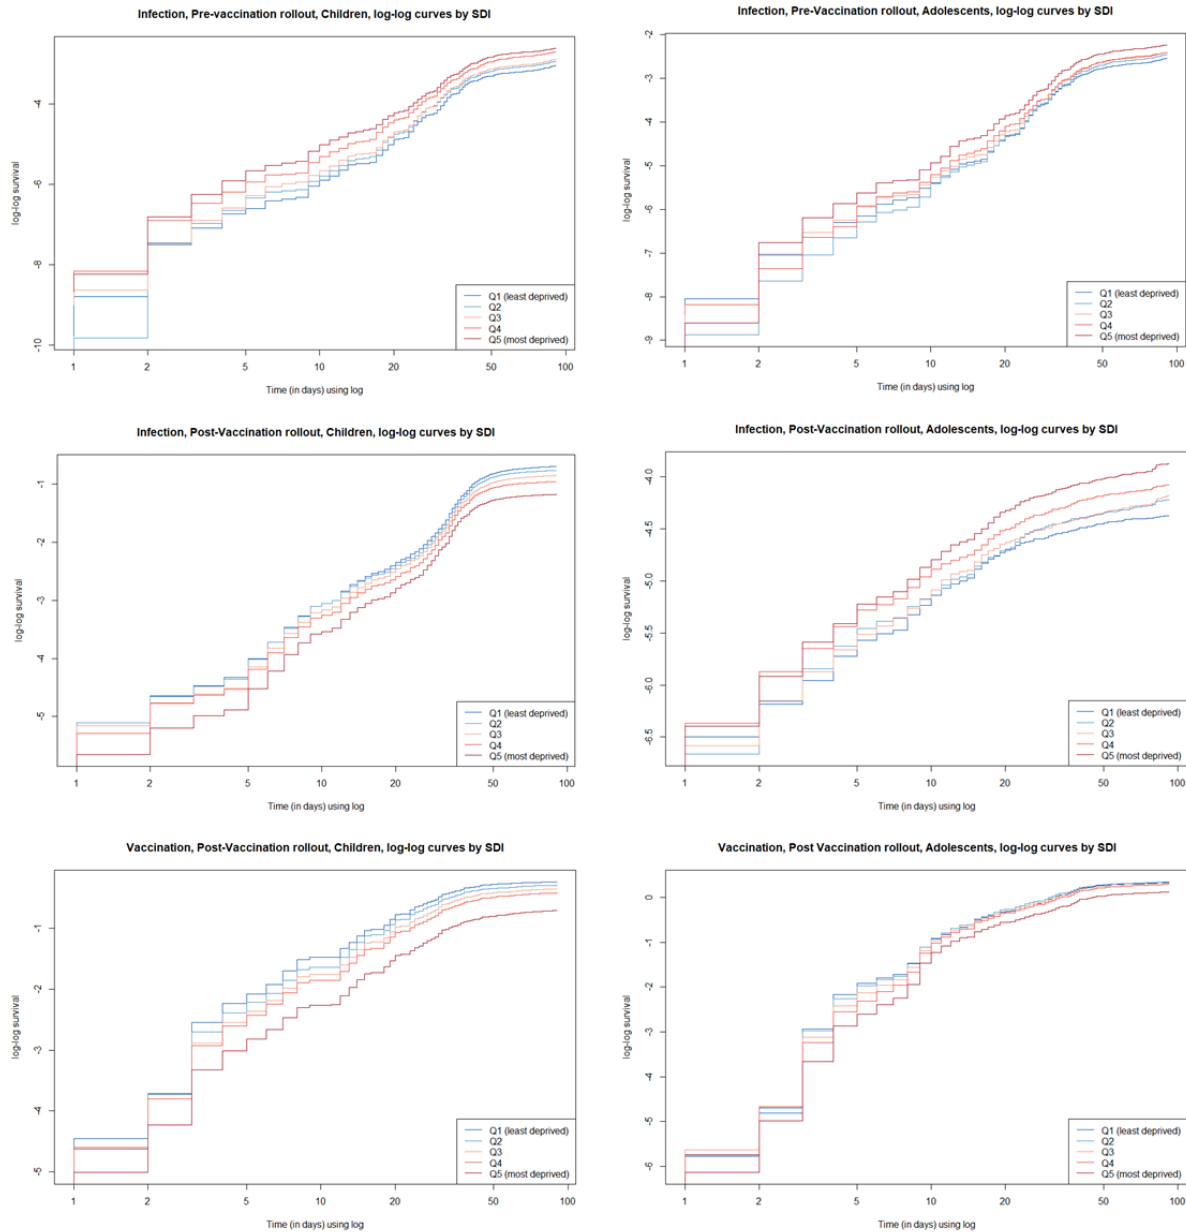

Pre-vaccination period (Sep 26 - Dec 26 2020), Vaccination period, adolescents (Aug 1 - Oct 1 2021), Vaccination period, children (15 Dec 2021 - 15 Mar 2022). Quintiles listed from least deprived (Q1) to most deprived (Q5). IQR, interquartile range; SDI, Socioeconomic Deprivation Index

**Figure S2.** Directed Acyclic Graph modelling the relationship between socioeconomic deprivation and COVID-19 infection among children and adolescents.

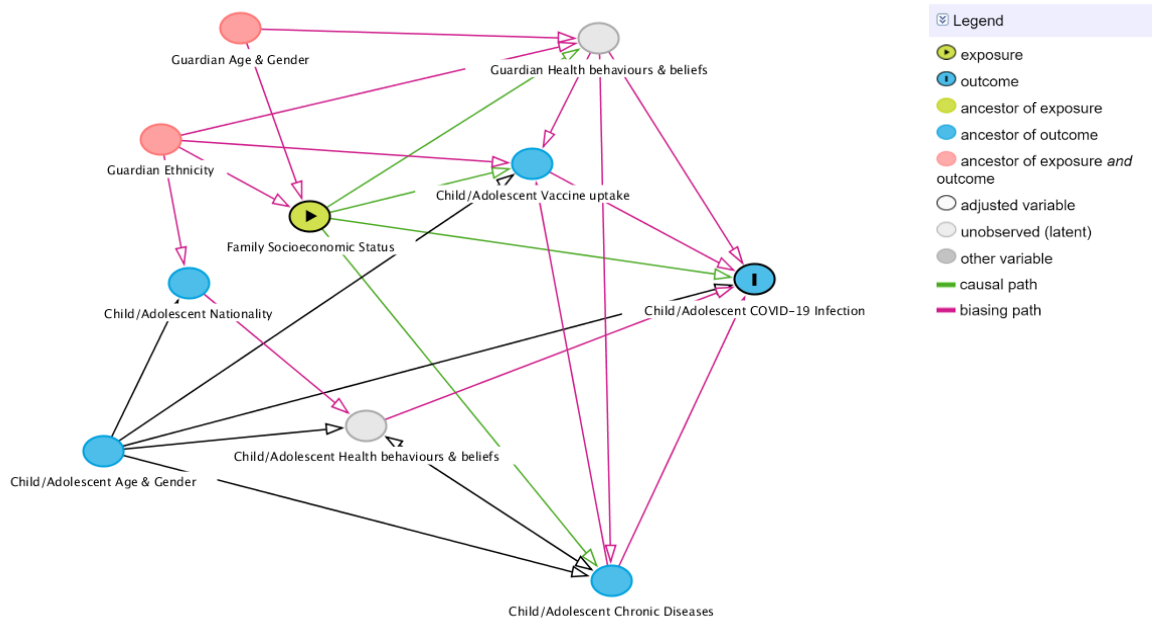

COVID-19; Coronavirus Disease 2019



**Figure S3.** Directed Acyclic Graph modelling the relationship between socioeconomic deprivation and COVID-19 vaccine uptake among children and adolescents.

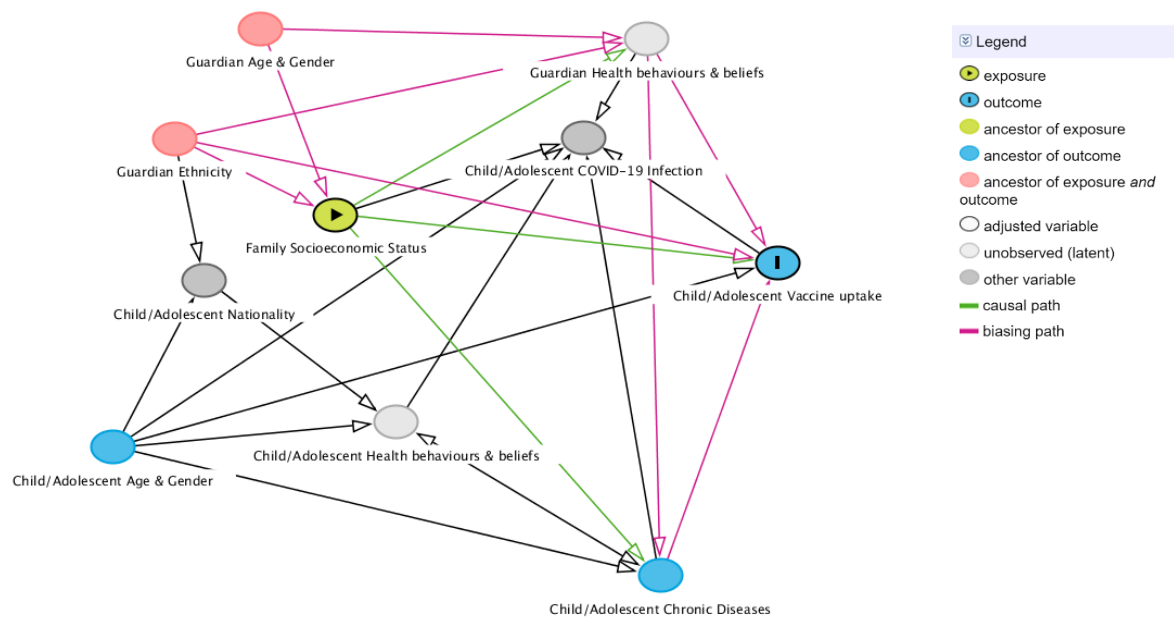

COVID-19; Coronavirus Disease 2019

**Figure S4.** Proportion of individuals who had performed one or more tests by age group and Socioeconomic Deprivation Index quintile, before and after the start of the vaccination rollout.

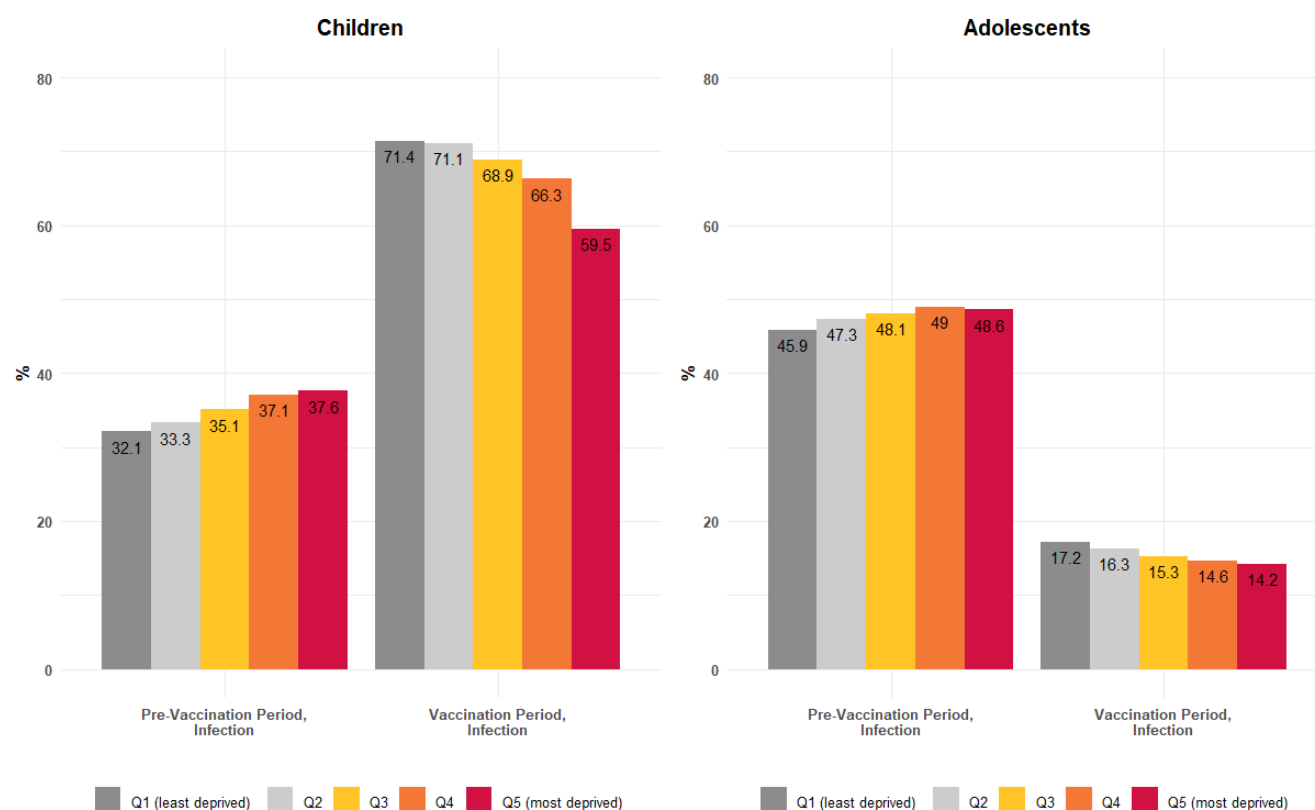

Quintiles listed from least deprived (Q1) to most deprived (Q5). SDI, Socioeconomic Deprivation Index. Pre-vaccination period (Sep 26 - Dec 26 2020), Vaccination period, adolescents (Aug 1 - Oct 1 2021), Vaccination period, children (15 Dec 2021 - 15 Mar 2022).
